# Supplementary material for: Deletion of a Rare Fungal PKS CgPKS11 Promotes Chaetoglobosin A Biosynthesis, Yet Defers the Growth and Development of Chaetomium globosum
Source: MDPI journal article supplement (doi:10.3390/jof7090750), 2021-09-13
Supplement: s1 [file s1]

## Supplementary materials

# Deletion of a Rare Fungal PKS CgPKS11 Promotes Chaetoglobosin A Biosynthesis, Yet Defers the Growth and Development of *Chaetomium globosum*

Biyun Xiang <sup>1</sup>, Xiaoran Hao <sup>2,\*</sup>, Qiaohong Xie <sup>1,3</sup>, Guangya Shen <sup>1</sup>, Yanjie Liu <sup>1</sup> and Xudong Zhu <sup>1,\*</sup>

<sup>1</sup> Beijing Key Laboratory of Genetic Engineering Drug and Biotechnology, College of Life Sciences, Beijing Normal University, Beijing 100875, China

<sup>2</sup> National Experimental Teaching Demonstrating Center, College of Life Sciences, Beijing Normal University, Beijing 100875, China

<sup>3</sup> Xiamen No.1 High School of Fujian, Xiamen 361000, China

\* Correspondence: zhu11187@bnu.edu.cn (X.D.Z); 2015xrhao@bnu.edu.cn (X.R.H); Tel: +86-010-58804266 (X.D.Z); Tel: +86-010-58802159-812

## ASSOCIATED CONTENT

### Supplementary Tables and Figures

**Table S1.** Putative PKSs presented in genomes of *C. globosum*.

**Table S2.** Primers used in this study.

**Table S3.** Expression of a predicted standalone ACP encoding gene CHGG\_09364.

**Figure S1.** Construction of *Cgpk11* deletion plasmid.

**Figure S2.** Diagnostic PCR screening for *Cgpk11* deletion mutants.

**Figure S3.** Southern blotting to confirm that Cas9 was eliminated in  $\Delta cgpk11$  mutants.

**Figure S4.** Effect of *Cgpk11* deletion on pigment biosynthesis during the liquid fermentation.

**Table S1.** Putative PKSs presented in genomes of *C. globosum*.

| Gene in NK102        | Gene in CBS148.51 | Type of PKS       | Location          |
|----------------------|-------------------|-------------------|-------------------|
| <i>Cgpk1</i>         | CHGG_00542        | Type I PKS        | Scaffold_1        |
| <i>Cgpk2</i>         | CHGG_03101        | Type I PKS        | Scaffold_2        |
| <i>Cgpk3</i>         | CHGG_05147        | Type I PKS        | Scaffold_4        |
| <i>Cgpk4</i>         | CHGG_09585        | Type I PKS        | Scaffold_7        |
| <i>Cgpk5</i>         | CHGG_04475        | Type I PKS        | Scaffold_4        |
| <i>Cgpk6</i>         | CHGG_08746        | Type I PKS        | Scaffold_6        |
| <i>Cgpk7</i>         | CHGG_05358        | NRPS-Type I PKS   | Scaffold_3        |
| <i>Cgpk8</i>         | CHGG_09586        | Type I PKS        | Scaffold_7        |
| <i>Cgpk9</i>         | CHGG_10092        | Type I PKS        | Scaffold_7        |
| <i>Cgpk10</i>        | CHGG_00046        | Type I PKS        | Scaffold_1        |
| <b><i>Cgpk11</i></b> | <b>CHGG_10647</b> | <b>Type I PKS</b> | <b>Scaffold_7</b> |
| <i>Cgpk12</i>        | CHGG_03589        | Type I PKS        | Scaffold_2        |
| <i>Cgpk13</i>        | CHGG_02374        | Type I PKS        | Scaffold_2        |
| <i>Cgpk14</i>        | CHGG_01021        | Type I PKS        | Scaffold_1        |

|               |            |                 |            |
|---------------|------------|-----------------|------------|
| <i>Cgpk15</i> | CHGG_04068 | Type I PKS      | Scaffold_4 |
| <i>Cgpk16</i> | CHGG_05286 | NRPS-Type I PKS | Scaffold_3 |
| <i>Cgpk17</i> | CHGG_05113 | Type I PKS      | Scaffold_4 |
| <i>Cgpk18</i> | CHGG_10027 | Type I PKS      | Scaffold_7 |
| <i>Cgpk19</i> | CHGG_10128 | Type I PKS      | Scaffold_7 |
| <i>Cgpk20</i> | CHGG_07645 | Type I PKS      | Scaffold_5 |
| <i>Cgpk21</i> | CHGG_01239 | NRPS-Type I PKS | Scaffold_1 |
| <i>Cgpk22</i> | CHGG_07638 | Type I PKS      | Scaffold_5 |
| <i>Cgpk23</i> | CHGG_00087 | Type I PKS      | Scaffold_1 |
| <i>Cgpk24</i> | CHGG_08147 | Type I PKS      | Scaffold_5 |
| <i>Cgpk25</i> | CHGG_08793 | Type I PKS      | Scaffold_6 |
| <i>Cgpk26</i> | CHGG_08141 | Type I PKS      | Scaffold_5 |
| <i>Cgpk27</i> | CHGG_00246 | Type I PKS      | Scaffold_1 |
| <i>Cgpk28</i> | CHGG_08934 | Type III PKS    | Scaffold_6 |

Table S2. Primers used in this study.

| Primer name   | Sequence (5'-3')                                |
|---------------|-------------------------------------------------|
| act1p-F       | GCAGGCATGCAAGCTCATCGTGATGGTCGTTGAAACC           |
| act1p-R       | CTTCTTTGGGGCCATTTTGACGGCTGGAAAGGTGC             |
| cas9in-F      | ATGGCCCCAAAGAAGAAGCG                            |
| cas9in-R      | GGCCAGTGCCAAGCTTCCCCAGCATGCCTGCTATT             |
| CXcas9infu-1  | ATCCGGTTCTTCCGTCTGGT                            |
| u6gdna1-F     | CGAAATTCGAGCTCGCGATGCAATGCAGCTGGAA              |
| u6gdna1-R     | CGGTCTTCATGAAGACTAGAGGAAAAGAAAGAGA              |
| u6gdna2-F     | TAGTCTTCATGAAGACCGGTTTTAGAGCTAGAAATAGCAA<br>GTT |
| u6gdna2-R     | CTAGAGGATCCCCGGCTCGAGTAAAACAAAAAAGCAC           |
| Hyg-Xba I-F   | TTTGTGTTTACTCGAGTCTAGAGTCGACAGAAGATGA           |
| Hyg-Xho I-R   | GGATCCCCGGCTCGAGAAAGAAGGATTACCTCTAAACAAG<br>T   |
| PCgpk11-UF    | TTTACTCGAGTCTAGCTACGAAACAAGCAGGATGGATGG         |
| PCgpk11-UR    | TTCTGTGCTAGTCTAGGCCTCACGGATACAATCTTCTTGG        |
| PCgpk11-DF    | CCGGGGATCCTCTAGGACACCGCTTTCTTTGAGTGCC           |
| PCgpk11-DR    | TAGAGGATCCTCTAGAGCGTGTAAGCAATATCAGCG            |
| PCgpk11-N19-F | CCTCGATGCCGTAACCTCCCCTT                         |
| PCgpk11-N19-R | AAACAAGGGGAGGTTACCGGCATC                        |
| P11-KO-VP-F   | ATAGGTTGTAGGTGGGCTG                             |
| P11-KO-VP-R   | CGTTCTGGCTCATACTCAC                             |
| iHYG-R        | GCAAAGTGCCGATAAACAT                             |
| PHYG-ter-F    | TGAATGCTCCGTAACACC                              |
| HYG-F         | CTAGAGTCGACAGAAGATGA                            |
| HYG-R         | AAAGAAGGATTACCTCTAAACAAGT                       |
| qCgpk11-F     | CGCTATCTACCTCAAGAAGTCA                          |
| qCgpk11-R     | GAGGTTACCGGCATTTCTGT                            |
| q10646-F      | CATTTCTCTGGCTGACCTTG                            |
| q10646-R      | GACTTCATCTCTTCATCTCTGT                          |
| q10649-F      | TCAAGCACCAATCTCCAGTT                            |
| q10649-R      | GGCTTCTCAAAGTCGGTTC                             |
| q10650-F      | GATACTTTGTACCCGAGGTC                            |
| q10650-R      | CGAGGCGTAGCAACATATC                             |
| PCas9-PF      | CCCACCATCTACCACCTGA                             |

|            |                            |
|------------|----------------------------|
| PCas9-PR   | GCCGCCAGTAGTTCTTCAT        |
| qGAPDH-F   | AACGGCAAGAAGGTCAAG         |
| qGAPDH-R   | TCTCGGTGGTAGTGAACA         |
| q01237-F   | GGAAGGACCGATACCATAAAC      |
| q01237-R   | TCTAAACCCATTCTACAACCG      |
| q01238-F   | CAGAGGGATGTGGGTAAGGG       |
| q01238-R   | CTAACGTATATTATAAGCGAGCGA   |
| q01239-F   | GATTTCCTCGGTTGTGCTTA       |
| q01239-R   | CATAGTGATACCTTGCGTTCTCC    |
| q01240-F   | GGTATTACAACGGATGCGACTT     |
| q01240-R   | CGGTAGGAGAACACGCTGAC       |
| q01241-F   | GAGGAATGGCACCAGGAAT        |
| q01241-R   | AGTTAAGCGGCAGCATCT         |
| q01242-1-F | GGCTTCCAAAGCATAACGCAG      |
| q01242-1-R | TGGTGTTCGTTTCGGGTCTCC      |
| q01242-2-F | GCCGTGTCCGAGAGTTATGT       |
| q01242-2-R | AGAGGAAAGCCAGCAGTTTCG      |
| q01243-F   | CGGTCTTGCGGCTATTGAT        |
| q01243-R   | GCTGGCGACTTCTTGCTCTG       |
| q01244-F   | CACACGCAACGAGTATATCCT      |
| q01244-R   | ATCGTGCTTTGCCGCTTC         |
| q00542-F   | ATCTTTCCGCCTAACCCGA [19]   |
| q00542-R   | GTCCTTCGTTTCTGGGTTGTC [19] |

\* The bold parts indicate the homologous arms of the primers. The underlined part represents the reserved restriction enzyme site.

**Table S3.** Expression of a predicted standalone ACP encoding gene CHGG\_09364.

| Gene symbol | Deduced function | FPKM_WT1 | FPKM_WT2 | FPKM_WT3 | pval        |
|-------------|------------------|----------|----------|----------|-------------|
| CHGG_09364  | ACP domain       | 1.53394  | 1.45815  | 1.37813  | 0.004947391 |

\*FPKM: Fragments per Kilobase Million; WT1/WT2/WT3: Three culture replicates of wild-type strains have been used.  
pval: *p*-value.

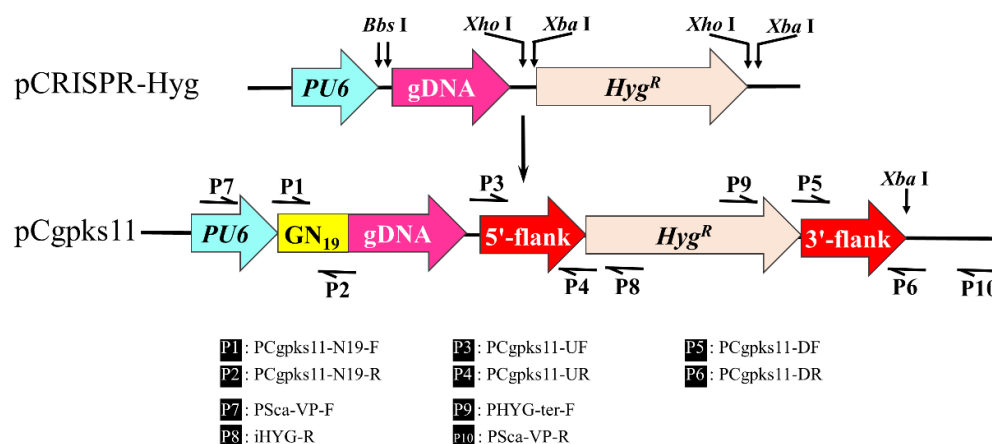

**Figure S1.** Construction of *Cgpk11* deletion plasmid. Primers for plasmid construction or diagnostic PCR are indicated in black boxes.

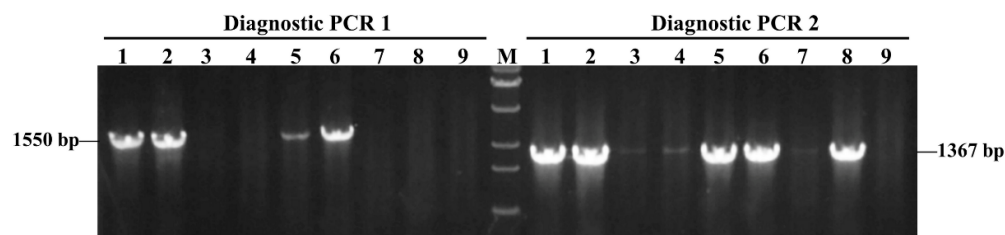

**Figure S2.** Diagnostic PCR screening for *Cgpk11* deletion mutants. A 1550 bp fragment could be amplified by primers P11-KO-VP-F/iHYG-R, and a 1367 bp fragment could be amplified by primers PHYG-ter-F/P11-KO-VP-R. Lanes 1-9 were loaded samples from transformants NO11-19. M: Trans15K DNA Marker.

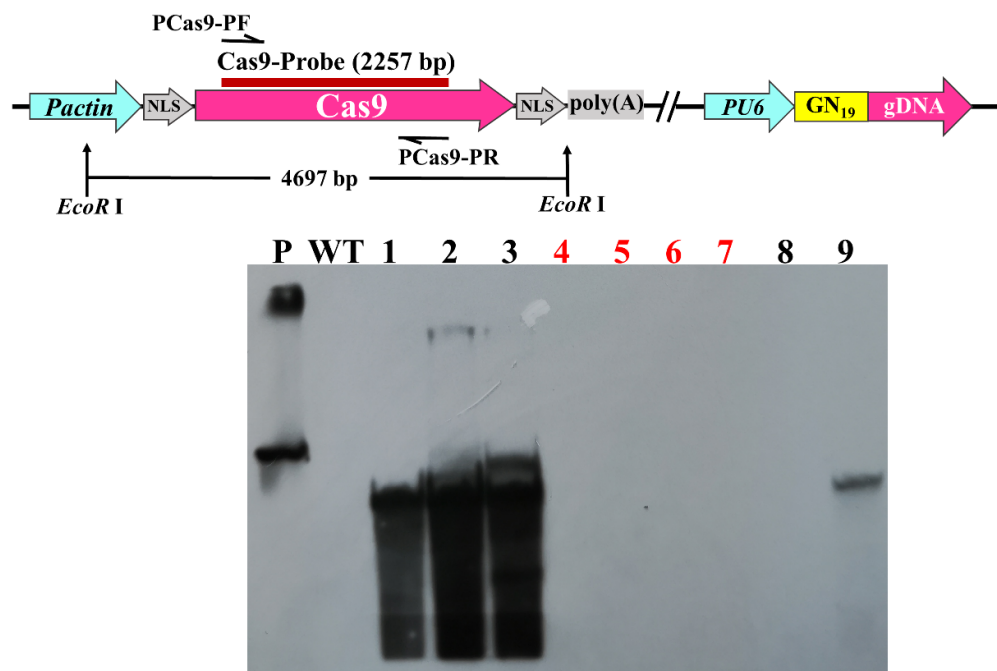

**Figure S3.** Southern blotting to confirm that Cas9 was eliminated in  $\Delta cgpk11$  mutants. Cas9-probe was labeled and used as the probe, the unlinearized Cas9-containing plasmid pCRISPR-Hyg was used as the control. Lanes 1-9 were loaded samples from randomly selected transformants NO1, NO3, NO9, NO11, NO12, NO15, NO16, NO23 and NO33.

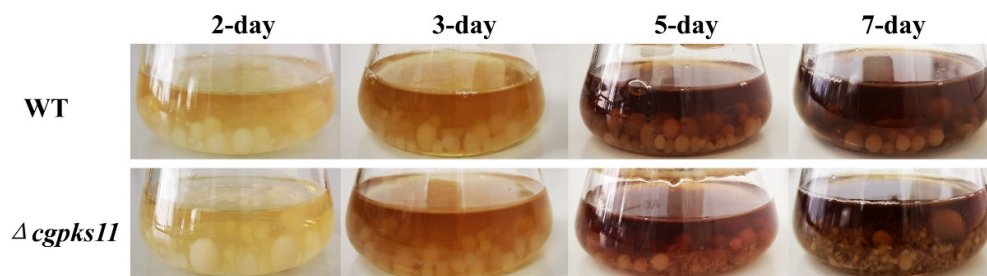

**Figure S4.** Effect of *Cgpk11* deletion on pigment biosynthesis during the liquid fermentation.
